# Supplementary material for: A green and efficient two-step enzymatic esterification-hydrolysis method for enrichment of c9,t11-CLA isomer based on a three-liquid-phase system
Source: Royal Society of Chemistry journal article supplement (doi:10.1039/d3ra02054a), 2023-01-01
Supplement: d3ra02054a1.pdf [file d3ra02054a1.pdf]

### The synthesis method of deep eutectic solvents

The hydrogen bond acceptor and hydrogen bond donor are mixed in a certain molar ratio, stirred in a water bath at 100 °C to a colorless transparent solution, and allowed to stand at room temperature.

**Table S1** Hydrolysis of CLA-EE by different enzymes<sup>a</sup>

|                | CALB     | G50      | MAS1     | MH       | SD       | AYS      |
|----------------|----------|----------|----------|----------|----------|----------|
| Hydrolysis (%) | 52.0±2.3 | 5.7±1.0  | 27.2±1.5 | 11.1±2.1 | 28.7±1.9 | 24.1±1.3 |
| Purity (%)     | 40.3±1.1 | 63.4±1.7 | 59.9±1.6 | 54.1±1.0 | 32.7±0.5 | 86.4±0.6 |

<sup>a</sup>Lipozyme CALB, *Candida antarctica* lipase B; G50, *Penicillium camembertii*; MAS1, marine *Streptomyces* sp. MAS1 lipase; Lipase PS Amano SD, *Burkholderia cepacia*; Lipase AYS, *Candida rugosa* lipase;  
Purity (%) : Purity of c9, t11-CLA

**Table S2** Number of phases in different systems

|                                                 | PEG400 | PEG600 | PEG2000 | BMIM[BF <sub>4</sub> ] | BMIM[PF <sub>6</sub> ] | Ethanol |
|-------------------------------------------------|--------|--------|---------|------------------------|------------------------|---------|
| (NH <sub>4</sub> ) <sub>2</sub> SO <sub>4</sub> | III    | III    | III     | III                    | III                    | II      |
| Na <sub>2</sub> SO <sub>4</sub>                 | III    | III    | III     | III                    | III                    | II      |

III: three-phase; II: two-phase;

**Table S3** The effect of selective hydrolysis of CLA-EE isomers and the distribution behavior of lipases in different systems

|                | PEG600/K <sub>2</sub> HPO <sub>4</sub> | PEG2000/K <sub>2</sub> HPO <sub>4</sub> | PEG2000/Na <sub>2</sub> SO <sub>4</sub> | BMIM[PF <sub>6</sub> ]/Na <sub>2</sub> SO <sub>4</sub> | CG/K <sub>2</sub> HPO <sub>4</sub> |
|----------------|----------------------------------------|-----------------------------------------|-----------------------------------------|--------------------------------------------------------|------------------------------------|
| K              | 6.9±1.3                                | 0.8±0.0                                 | 0.4±0.0                                 | 0.3±0.0                                                | 2.6±0.4                            |
| Y (%)          | 84.8±2.5                               | 36.9±2.6                                | 24.6±0.7                                | 55.6±1.8                                               | 68.1±3.2                           |
| Hydrolysis (%) | —                                      | —                                       | 24.7±1.3                                | 31.9±0.2                                               | -                                  |
| Purity (%)     | —                                      | —                                       | 57.8±0.2                                | 87.4±0.6                                               | -                                  |

Purity (%) : Purity of c9, t11-CLA; CG: Choline chloride: glycerin=1:1, 30% CG, 25% K<sub>2</sub>HPO<sub>4</sub>;

**Table S4** Effect of pH on selective hydrolysis of CLA-EE isomers in TLPS.

|                | pH 4     | pH 5.2*  | pH 6     | pH 7     | pH 8     | pH 9    |
|----------------|----------|----------|----------|----------|----------|---------|
| Hydrolysis (%) | 44.6±2.4 | 45.1±2.1 | 44.8±1.0 | 35.0±2.6 | 27.6±1.9 | 5.1±0.5 |
| Purity (%)     | 90.7±0.3 | 90.9±0.3 | 91.0±0.3 | 90.1±0.3 | 88.8±0.4 | —       |

\*Initial pH of reaction system

**Table S5** Diameter and specific surface of oil phase droplets dispersed middle phase, bottom phase in TLPS and water, and middle phase droplets dispersed in the bottom phase.

| continuous phase                  | Water <sup>1</sup> | Middle phase <sup>1</sup> | Bottom phase <sup>1</sup> | Bottom phase <sup>2</sup> |
|-----------------------------------|--------------------|---------------------------|---------------------------|---------------------------|
| Droplet ( $\mu\text{m}$ )         | 69.800             | 20.709                    | 28.559                    | 6.697                     |
| SS ( $\text{m}^2 \text{g}^{-1}$ ) | 0.086              | 0.29                      | 0.21                      | 0.896                     |

SS: specific surface; <sup>1</sup>: the dispersed phase was the oil phase of TLPS; <sup>2</sup>: the dispersed phase was the middle phase of TLPS.

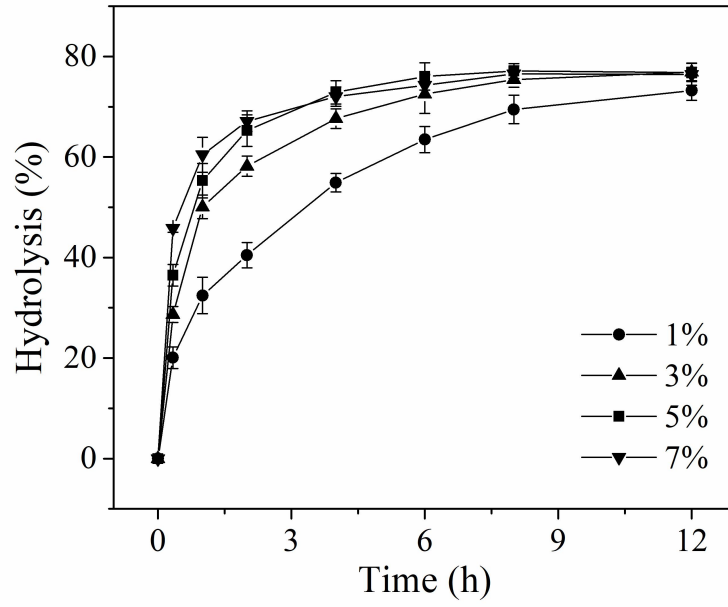

**Figure S1** Effect of the amount of enzyme added on the selective hydrolysis of CLA-EE isomers in TLPS.

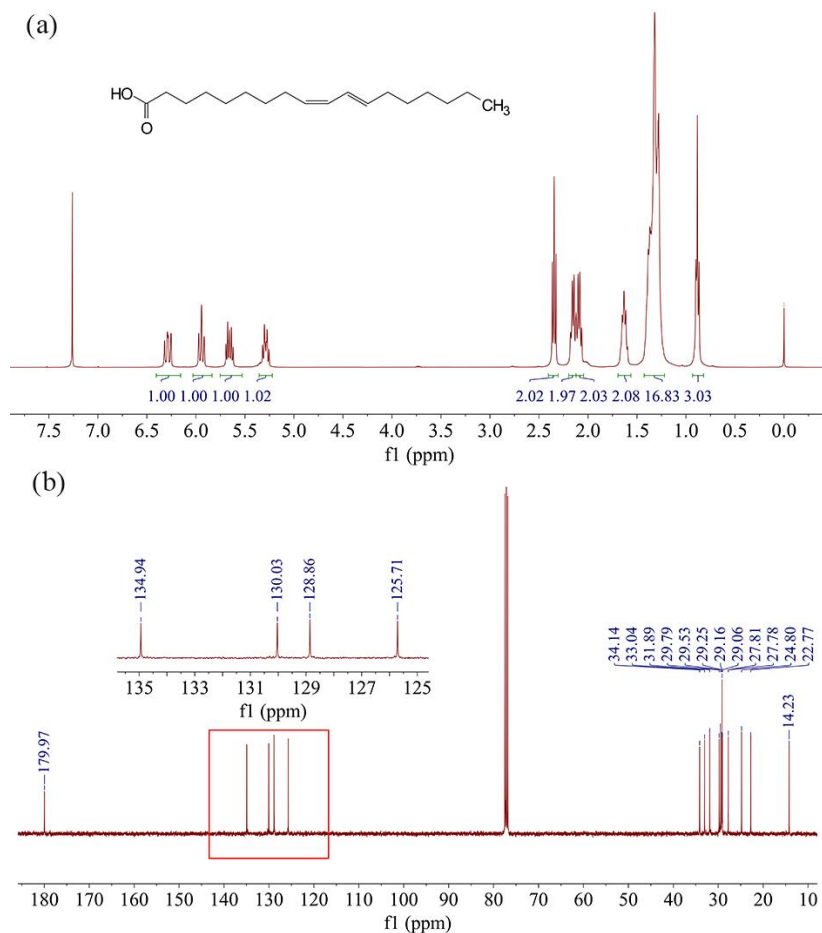

**Figure S2** (a) The  $^1\text{H}$  NMR spectra of product c9, t11-CLA; (b) The  $^{13}\text{C}$  NMR spectra of product c9, t11-CLA;  $^1\text{H}$  NMR (400 MHz,  $\text{CDCl}_3$ , TMS)  $\delta$  6.29 (dd,  $J = 15.0, 10.9$  Hz, 1H), 5.94 (t,  $J = 10.9$  Hz, 1H), 5.66 (dt,  $J = 14.6, 7.0$  Hz, 1H), 5.35 – 5.22 (m, 1H), 2.35 (t,  $J = 7.5$  Hz, 2H), 2.15 (q,  $J = 6.8$  Hz, 2H), 2.09 (q,  $J = 7.8, 7.3$  Hz, 2H), 1.63 (p,  $J = 7.4$  Hz, 2H), 1.43 – 1.22 (m, 16H), 0.88 (t,  $J = 6.7$  Hz, 3H).

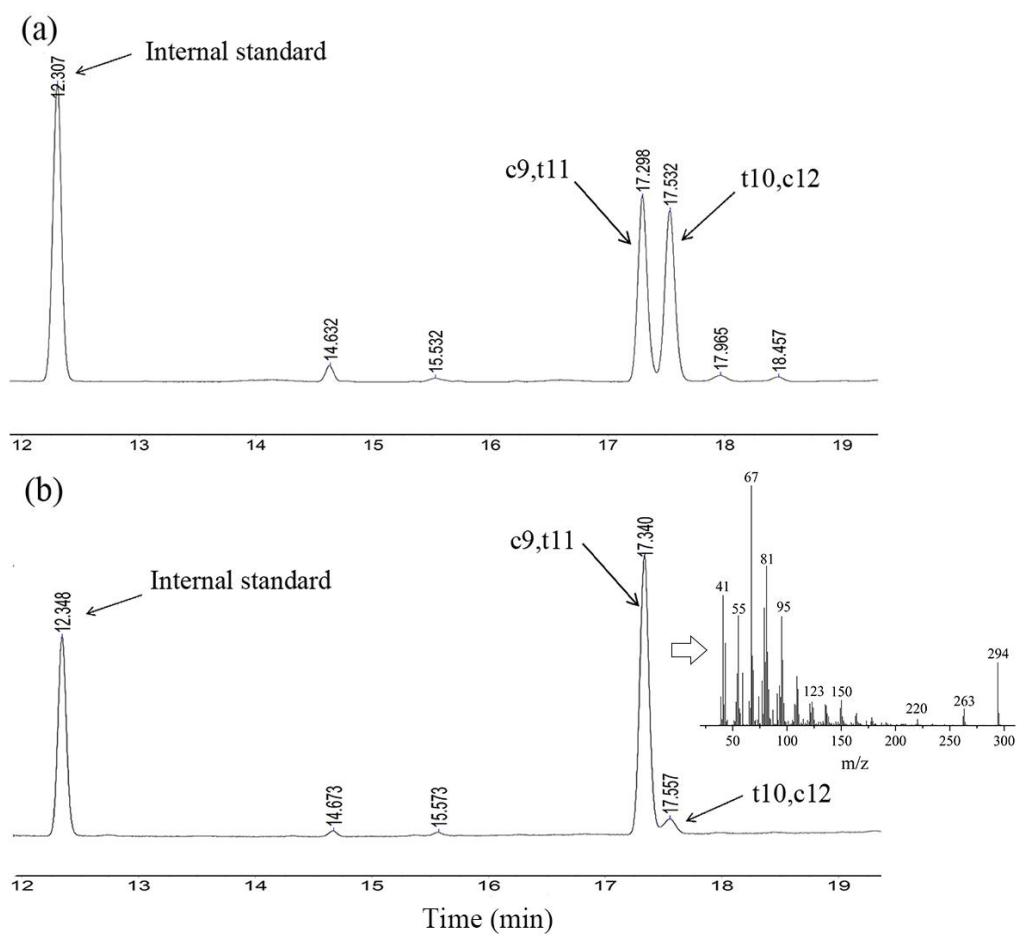

**Figure S3** The GC-MS analysis of CLA methyl ester. (a) CLA mixture; (b) product.
